# Supplementary material
Source: Springer Nature journal article supplement (https://www.springermedizin.de/resource/supplementary/12936_2014_3711_MOESM4_ESM.pdf/9545182)
Supplement: MOESM4 [file 9545182]

Subtype 1

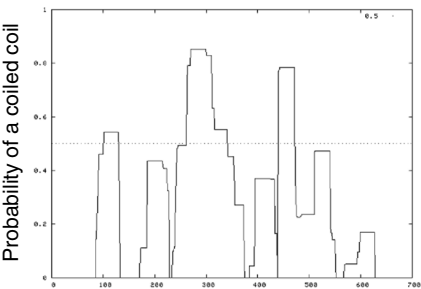

Subtype 2

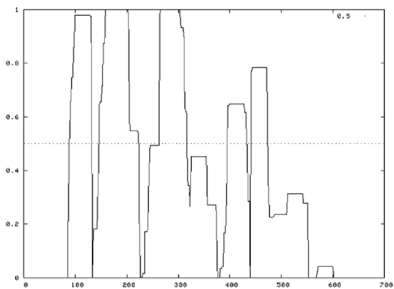

Subtype 3

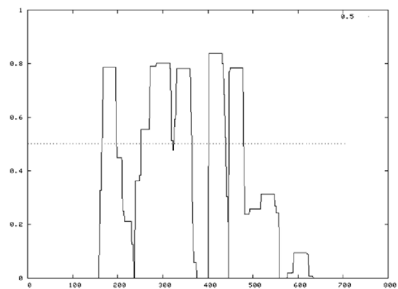

Subtype 4

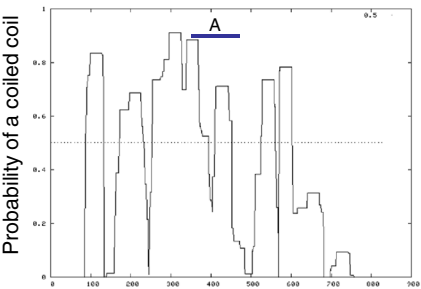

Amino acid residues

Subtype 5

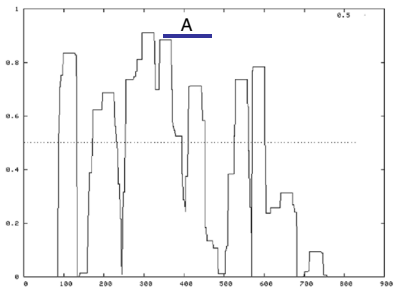

Amino acid residues

Sal I

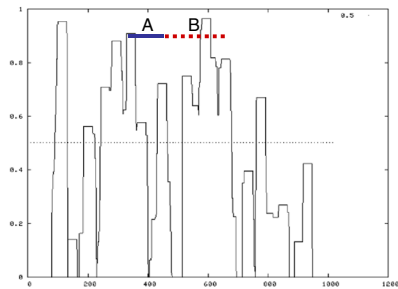

Amino acid residues
